# Supplementary material for: Recent Advancements and Strategies for Overcoming the Blood–Brain Barrier Using Albumin-Based Drug Delivery Systems to Treat Brain Cancer, with a Focus on Glioblastoma
Source: MDPI journal article supplement (doi:10.3390/polym15193969), 2023-10-02
Supplement: s1 [file s1]

## Supplementary materials

**The article's title:** Recent Advancements and Strategies for Overcoming the Blood–Brain Barrier Using Albumin-Based Drug Delivery Systems to Treat Brain Cancer, with a Focus on Glioblastoma

**Authors:** Camelia-Elena Tincu (Iurciuc), Călin Vasile Andrișoiu, Marcel Popa and Lăcrămioara Ochiuz

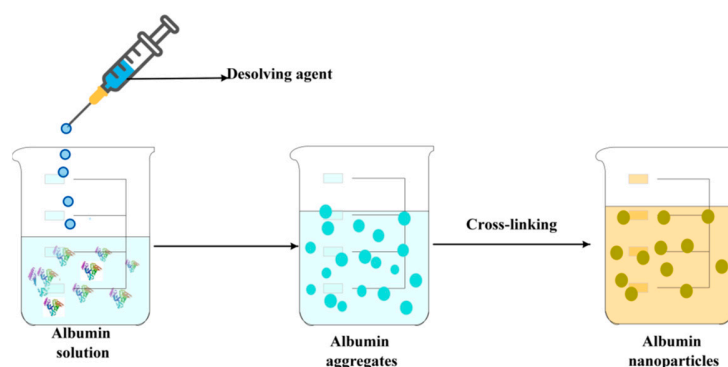

**Figure S1.** Schematic illustration of the albumin nanoparticles synthesis using the desolvation/coacervation method.

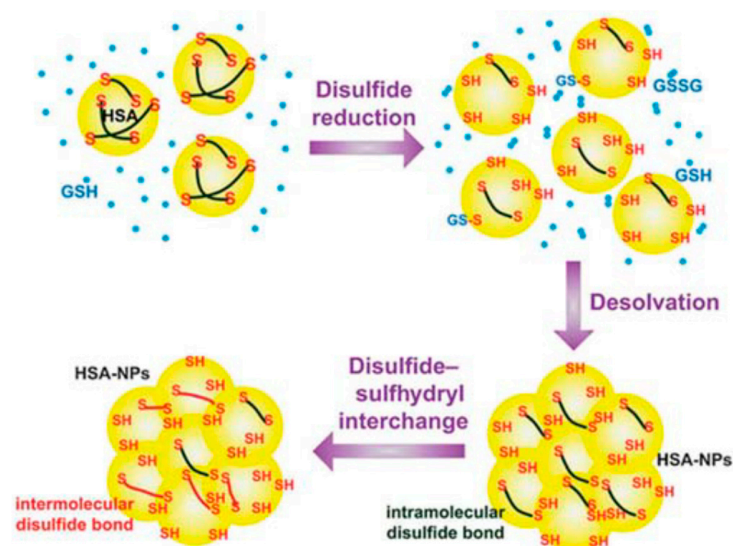

**Figure S2.** The schematization of the method used for obtaining nanoparticles based on HSA through a reduction and desolvation method [289].

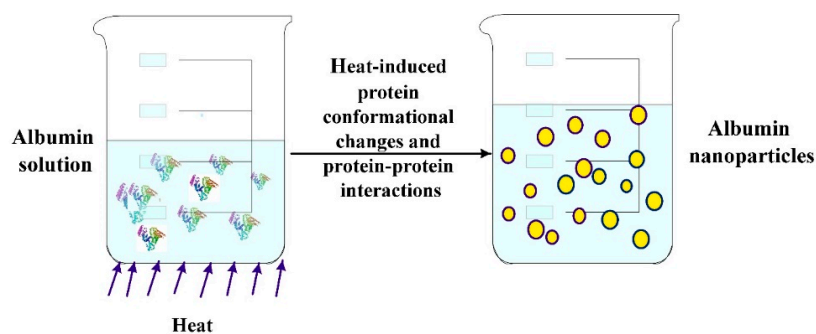

**Figure S3.** Obtaining nanoparticles by thermally induced aggregation.

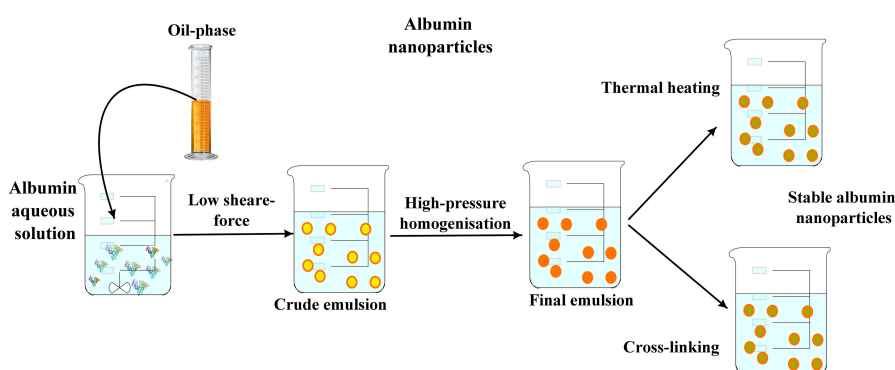

**Figure S4.** The schematization of the emulsion technique used for obtaining nanoparticles.

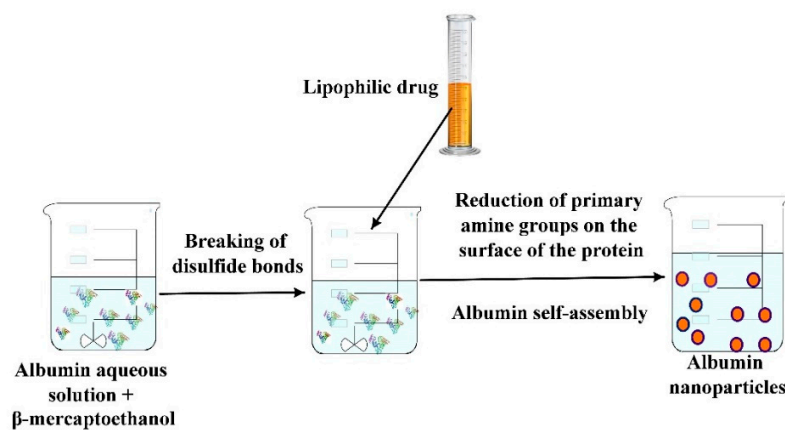

**Figure S5.** Schematic of the method of obtaining nanoparticles by self-assembly.

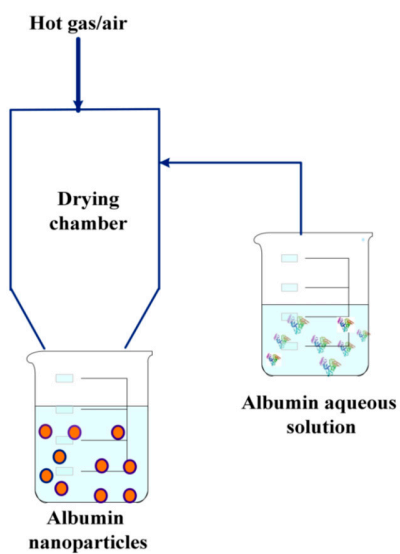

**Figure S6.** The schematization of the method used for obtaining albumin nanoparticles by spray-drying.

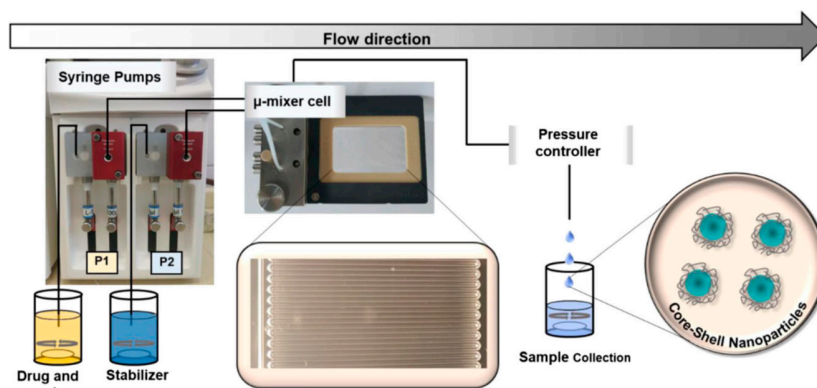

**Figure S7.** Schematic representation of the flow system, including the pumps and the  $\mu$ -mixer cell used to obtain the albumin nanoparticles [307].

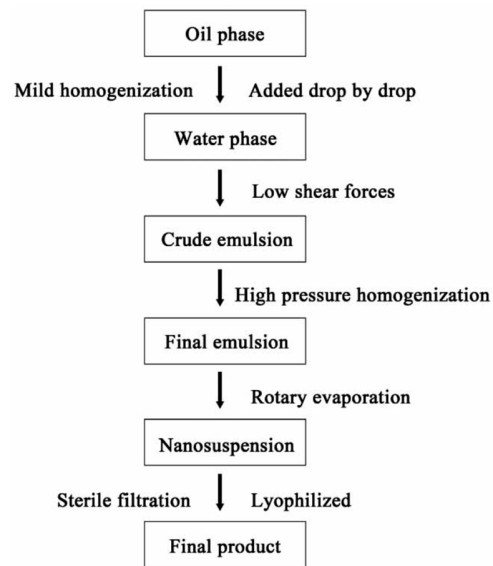

**Figure S8.** Schematization of NAB-tehnology. Preparation of nanoparticles [319].
